# Supplementary material for: A superhydrophobic–superoleophilic plasmonic membrane for combined oil/water separation and highly-sensitive SERS detection of low concentrations of analytes in oil/water mixtures
Source: Royal Society of Chemistry journal article supplement (doi:10.1039/c8nj02408a), 2018-01-01
Supplement: c8nj02408a2.pdf [file c8nj02408a2.pdf]

## Supporting information

# Superhydrophobic-superoleophilic plasmonic membrane for combined oil/water separation and high-sensitive SERS detection for low concentration of analytes in oil/water mixture

Cheng Xu, Ding Cao, Wenya Lu, Jun Sun, Si Cheng\*

*College of Chemistry, Chemical Engineering and Materials Science, Soochow University, Suzhou, Jiangsu 215123, China.*

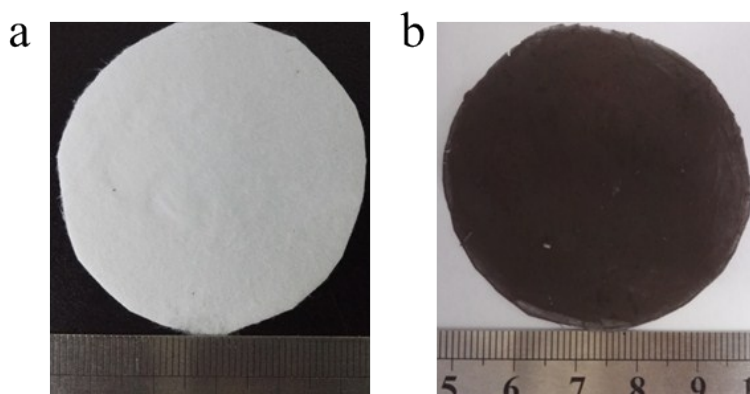

**Figure S1:** The photographs of (a) pure PS membrane and (b) superhydrophobic SERS substrate

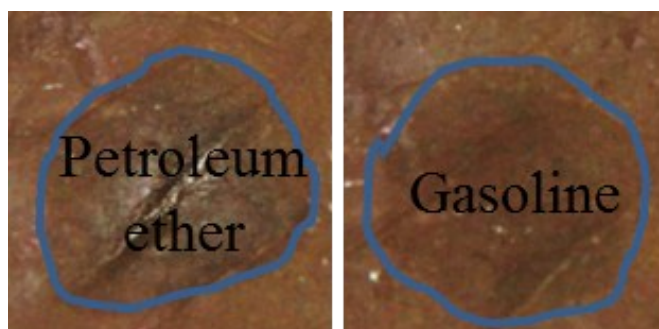

**Figure S2:** Photographs of (a) petroleum ether, (b) gasoline droplets collapsed on the superhydrophobic substrate.

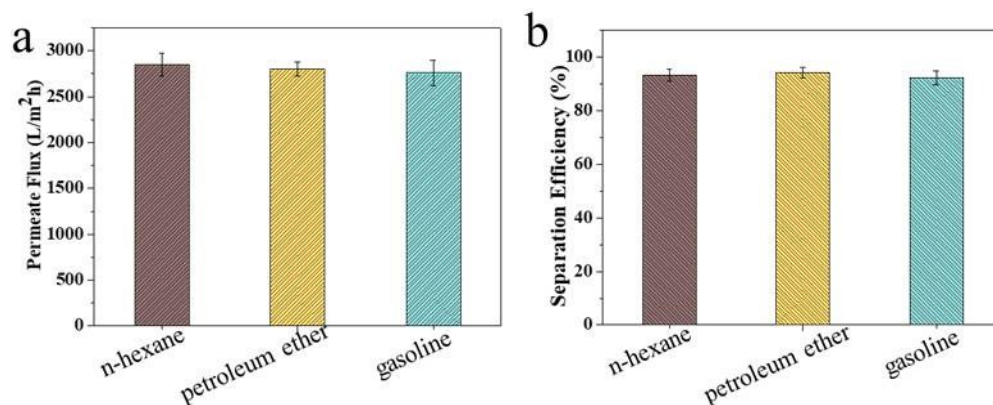

**Figure S3:** (a) Permeate flux and (b) water and oil separation efficiency of superhydrophobic substrate.

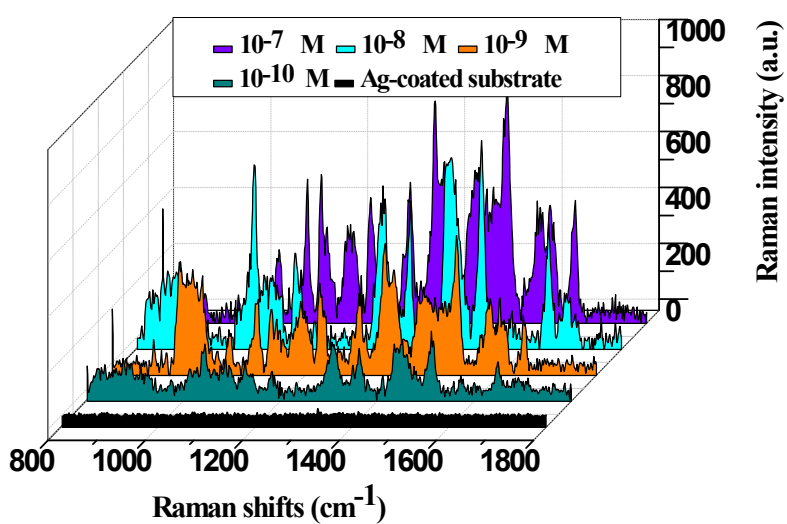

**Figure S4:** SERS spectra of the mixtures of Sudan III and R6G
